# Supplementary material for: Habitats Are More Important Than Seasons in Shaping Soil Bacterial Communities on the Qinghai-Tibetan Plateau
Source: MDPI journal article supplement (doi:10.3390/microorganisms9081595), 2021-07-27
Supplement: s1 [file s1]

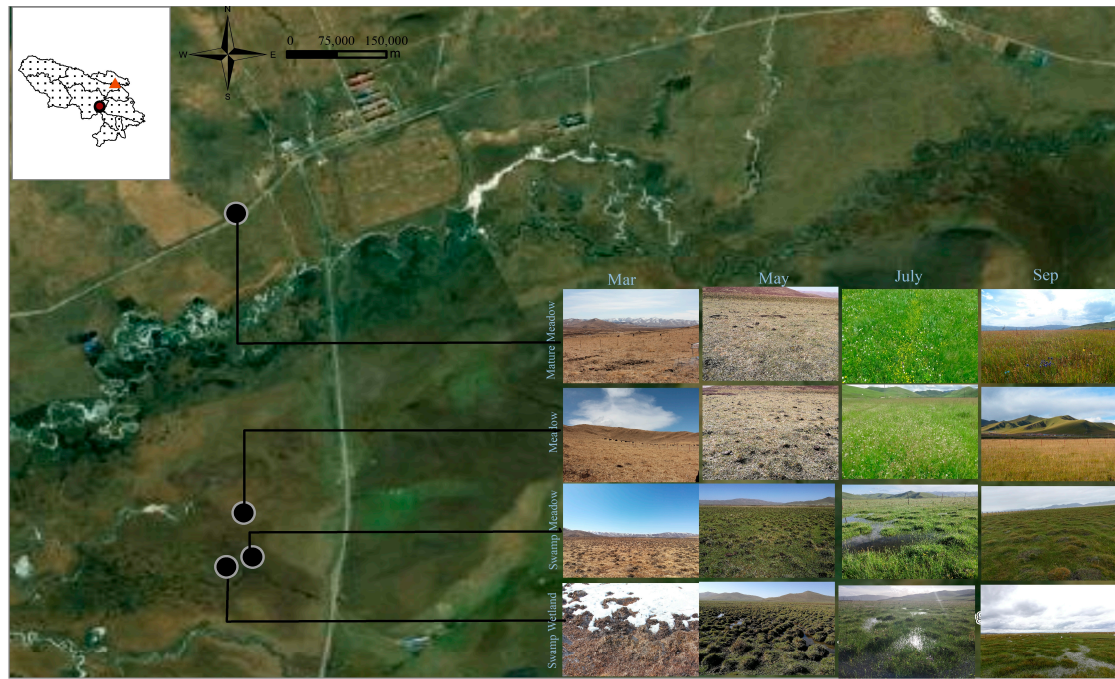

Supplementary Figure S1 | Characteristics of study sites in different habitats and sampling months. The dark circle and red triangle on the upper left map panel respectively represents sampling site and the location of county government.

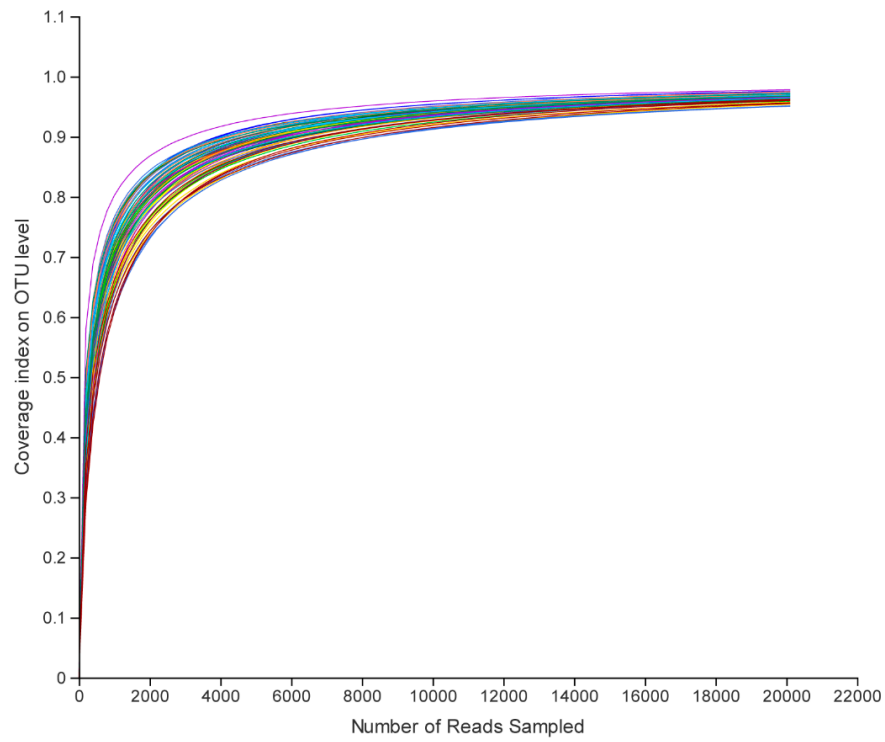

Supplementary Figure S2 | Rarefaction curve of coverage index on OTU level of all soil samples.

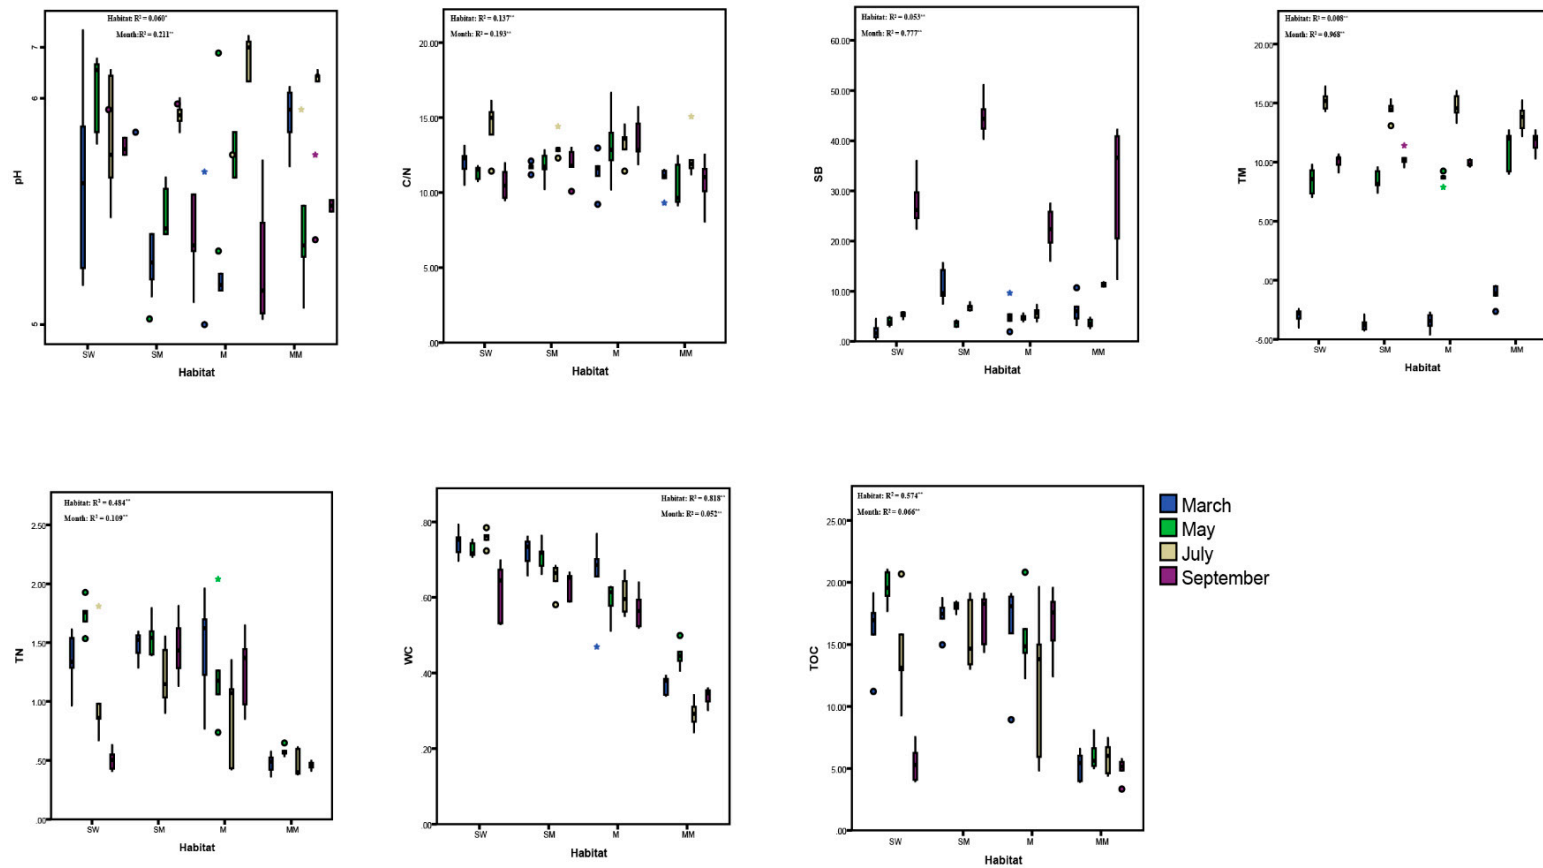

Supplementary Figure S3 | Boxplots showing the soil environmental variables in different months among the four habitats. The significant effect of months and habitat on each environmental variable was detected by one-way ANOVA. WC, soil water content; TOC, total organic carbon; TN, total nitrogen; SB, shoot biomass; TM, soil temperature based on the sampling days; \*\*  $P < 0.01$ ; \*  $P < 0.05$ . SW is swamp wetland, SM is swamp meadow, M is meadow, MM is mature meadow.

**Supplementary Table S1** Alpha diversity index in different habitats and months soil samples. SW is swamp wetland, SM is swamp meadow, M is meadow, MM is mature meadow.

| Habitat | Month     | Read number | Sobs          | Shannon     | Chao          | PD            |
|---------|-----------|-------------|---------------|-------------|---------------|---------------|
| W       | March     | 20112       | 1915.6±195.17 | 6.277±0.150 | 2602.0±264.31 | 181.29±13.956 |
|         | May       | 20112       | 1930.8±78.79  | 6.207±0.094 | 2696.5±197.89 | 185.00±3.990  |
|         | July      | 20112       | 2160.8±169.32 | 6.423±0.169 | 2955.8±231.00 | 193.15±7.557  |
|         | September | 20112       | 1853.2±187.65 | 6.132±0.303 | 2503.8±214.99 | 174.16±14.479 |
| SM      | March     | 20112       | 1849.0±239.43 | 6.252±0.148 | 2482.3±371.61 | 174.58±15.843 |
|         | May       | 20112       | 1861.2±177.86 | 6.186±0.123 | 2537.6±304.18 | 178.53±12.337 |
|         | July      | 20112       | 1922.2±332.10 | 6.132±0.420 | 2616.9±431.46 | 186.23±26.322 |
|         | September | 20112       | 1919.4±160.83 | 6.120±0.208 | 2624.7±202.86 | 179.10±5.953  |
| M       | March     | 20112       | 1913.6±189.07 | 6.288±0.153 | 2611.2±276.96 | 176.06±14.839 |
|         | May       | 20112       | 1699.2±55.28  | 6.005±0.072 | 2317.0±105.02 | 166.27±4.413  |
|         | July      | 20112       | 1803.2±193.10 | 6.061±0.253 | 2451.3±255.94 | 173.61±15.430 |
|         | September | 20112       | 2512.0±204.68 | 6.675±0.181 | 3553.5±352.57 | 219.83±14.803 |
| MM      | March     | 20112       | 2118.6±133.98 | 6.369±0.171 | 2832.5±128.74 | 181.64±10.185 |
|         | May       | 20112       | 2184.8±127.88 | 6.473±0.107 | 2984.4±197.44 | 191.82±9.107  |
|         | July      | 20112       | 2258.0±305.04 | 6.468±0.235 | 3031.4±464.09 | 194.34±24.663 |
|         | September | 20112       | 2458.2±136.42 | 6.689±0.155 | 3310.4±225.24 | 210.46±12.701 |

**Supplementary Table S2** Relevant data sheets of db-RDA in different months.  $r^2$  is the determination coefficient,  $P$  is the significance test value.

| Environment factors | $r^2$  | $P$ -values |
|---------------------|--------|-------------|
| TM                  | 0.5883 | 0.001       |
| TN                  | 0.1685 | 0.003       |
| pH                  | 0.1606 | 0.001       |
| SB                  | 0.135  | 0.004       |
| TOC                 | 0.1319 | 0.004       |
| C/N                 | 0.0999 | 0.013       |
| WC                  | 0.0657 | 0.084       |

WC is soil water content, TOC is total organic carbon, TN is total nitrogen, SB is shoot biomass, TM is soil temperature.

**Supplementary Table S3**  $R^2$  value of pairwise comparisons using PERMANOVA based on weighted UniFrac distances

|           | <b>SW</b>   | <b>SM</b>   | <b>M</b>    |
|-----------|-------------|-------------|-------------|
| <b>SM</b> | 0.03        | -           | -           |
| <b>M</b>  | 0.04        | 0.04        | -           |
| <b>MM</b> | <b>0.22</b> | <b>0.27</b> | <b>0.26</b> |

  

|                  | <b>March</b> | <b>May</b>  | <b>July</b> |
|------------------|--------------|-------------|-------------|
| <b>May</b>       | <b>0.09</b>  | -           | -           |
| <b>July</b>      | <b>0.14</b>  | <b>0.04</b> | -           |
| <b>September</b> | <b>0.07</b>  | <b>0.07</b> | <b>0.09</b> |

The  $R^2$  value indicates the degree of explanation of the grouping factor to the sample difference. Bold font indicates  $P < 0.05$ , indicating that the reliability of the test is high. SW is swamp wetland, SM is swamp meadow, M is meadow, MM is mature meadow.
